# Supplementary material
Source: PubMed Central journal article supplement (PMC9635584)

## SUPPLEMENTAL APPENDIX

**The following AML Study Group (AMLSG) institutions and investigators participated in this study:**

Jörg Westermann, M.D., Anne Flörcken, M.D., Charité Campus Virchow-Klinikum, Berlin, Germany; Maike de Wit, M.D., Lore Marretta, M.D., Vivantes Klinikum Neukölln, Berlin, Germany; Roland Schroers, M.D., Alexander Baraniskin, M.D., Medizinische Universitätsklinik Ruhr-Universität-Bochum, Knappschafts-Krankenhaus, Bochum, Germany; Karin Mayer, M.D., Peter Brossart, M.D., Universitätsklinikum Bonn, Bonn, Germany; Jürgen Krauter M.D., Miriam Ahlborn, M.D., Städtisches Klinikum, Braunschweig, Germany; Helga Bernhard, M.D., Tu-Anh Dang, M.D., Klinikum Darmstadt, Darmstadt, Germany; Thomas Schroeder, M.D., Ulrich Germing, M.D., Universitätsklinikum Düsseldorf, Düsseldorf, Germany; Mohammed Wattad, M.D., Peter Reimer, M.D., Kliniken Essen Süd, Ev. Krankenhaus Essen-Werden gGmbH, Essen, Germany; Swen Weißendorf, M.D., Rebekka Mannal, M.D., Klinikum Esslingen, Esslingen, Germany; Hans Günter Derigs, M.D., Klinikum Frankfurt-Höchst GmbH, Frankfurt, Germany; Michael Lübbert M.D., Ralph Wäsch, M.D., Universitätsklinikum Freiburg, Freiburg, Germany; Maisun Abu-Samra, M.D., Wolfgang Blau, M.D., Universitätsklinikum Gießen, Gießen, Germany; Veronika Hoffmann-Schneider, M.D., Volker Runde, M.D., Wilhelm-Anton-Hospital, Goch, Germany; Gerald Wulf, M.D., Wolfram Jung, M.D., Universitätsklinikum Göttingen, Göttingen, Germany; Heinz Sill, M.D., Medizinische Universität Graz, Graz, Austria; Walter Fiedler, M.D., Maxim Kebenko, M.D., Universitätsklinikum Hamburg-Eppendorf, Hamburg, Germany; Hans Salwender, M.D., Cord Beeger, M.D., Asklepios Klinik Altona, Hamburg, Germany; Elisabeth Lange, M.D., Andrea Stoltefuß, M.D., Evangelisches Krankenhaus Hamm, Hamm, Germany; Andrea Sendler, M.D., Martin Burk, M.D., Klinikum Hanau, Hanau, Germany; Arnold Ganser, M.D., Michael Heuser, M.D., Felicitas Thol, M.D., Medizinische Hochschule Hannover, Hannover, Germany; Uwe Martens, M.D., Markus Lindauer, M.D., SLK-Kliniken GmbH Heilbronn, Heilbronn, Germany; Jörg Bittenbring, M.D., Nicole Adrian, M.D., Universitätsklinikum des Saarlandes, Homburg, Germany; David Nachbaur, M.D., Günter Gastl, M.D., Universitätsklinikum Innsbruck, Innsbruck, Austria; Mark Ringhoffer, M.D., Martin Bentz, M.D., Städtisches Klinikum Karlsruhe gGmbH, Karlsruhe, Germany; Heinz A. Horst, M.D., Björn-Niklas Heydrich, M.D., Universitätsklinikum Schleswig-Holstein–Campus Kiel, Kiel, Germany; Gregor Aschauer, M.D., Andreas Petzer, M.D., Krankenhaus der Barmherzigen

Schwestern Linz, Linz, Austria; Sigrig Machherndl-Spandl, M.D., Michael Girschikofsky, M.D., Krankenhaus der Elisabethinen Linz, Linz, Austria; Gerhard Heil, M.D., Christine Hempel-Overhage, M.D., Klinikum Lüdenscheid, Lüdenscheid, Germany; Thomas Heinicke, M.D., Thomas Fischer, M.D., Universitätsklinikum Magdeburg, Magdeburg, Germany; Thomas Kindler, M.D., Markus Radsak, M.D., Universitätsklinikum Mainz, Mainz, Germany; Hans-Joachim Tischler, M.D., Martin Grießhammer, M.D., Johannes Wesling Klinikum, Minden Germany; Katharina Götze, M.D., Mareike Verbeek, M.D., Klinikum rechts der Isar der Technischen Universität München, München, Germany; Sabine Struve, M.D., Clemens Wendtner, M.D., München Klinik Schwabing, München, Germany; Doris Kraemer, M.D., Jochen Casper, M.D., Klinikum Oldenburg, Oldenburg, Germany; Frank Griesinger, M.D., Pius Hospital Oldenburg, Oldenburg, Germany; Thomas Südhoff, M.D., Thorsten Nitsch, M.D., Klinikum Passau, Passau, Germany; Michael Schenk, M.D., Krankenhaus Barmherzige Brüder Regensburg, Regensburg, Germany; Oliver Schmah, M.D., Gregg Frost, M.D., Caritas-Klinik St. Theresia, Saarbrücken, Germany; Richard Greil, M.D., Gudrun Russ, M.D., Universitätsklinikum der Paracelsus Medizinischen Universität Salzburg, Salzburg, Austria; Jan Schleicher, M.D., Alf Zerweck, M.D., Klinikum Stuttgart, Stuttgart, Germany; Heinz Kirchen, M.D., Monika Lankeshofer-Loch, M.D., Krankenhaus der Barmherzigen Brüder Trier, Trier, Germany; Helmut Salih, M.D., Markus Schittenhelm, M.D., Universitätsklinikum Tübingen, Tübingen, Germany; Hartmut Döhner, M.D., Konstanze Döhner, M.D., Peter Paschka, M.D., Universitätsklinikum Ulm, Ulm, Germany; Paul Graf La Rosée, M.D., Martin Henkes, M.D., Schwarzwald-Baar Klinikum Villingen-Schwenningen GmbH, Villingen-Schwenningen, Germany; Elisabeth Koller, M.D., Hanuschkrankenhaus, Wien, Austria; Aruna Raghavachar, M.D., Silke Schostok, M.D., Helios-Klinikum Wuppertal, Wuppertal, Germany.

## **Methods**

### **RNA extraction and cDNA synthesis**

Total RNA extraction was performed from  $10^7$  cells using AllPrep Mini Kit (Qiagen, Hilden, Germany) according to the manufacturer's instructions. Reverse transcription reaction was run with 2 µg total RNA using TaqMan® Reverse transcription Kit (Applied Biosystems, Foster City, CA) and contained the following reagents: TaqMan® 10X RT Buffer (1x), MgCl<sub>2</sub> (5.5 mM), nucleoside triphosphates (2.5 mM), random hexamers (2.5 µM), RNase inhibitor (0.4 U/µl) and MultiScribe™ reverse transcriptase (1.25 U/µl). The total volume was 30 µl. Reaction

conditions were 25°C for 10 minutes (primer incubation), 48°C for 30 minutes (reverse transcription), and 95°C for 5 minutes (inactivation of reverse transcriptase).

### **RT-qPCR reaction**

RT-qPCR reactions were carried out using the MicroAmp™ Fast Optical 96-Well Reaction Plate (Applied Biosystems, Foster City, CA). The total volume for quantification of *RUNX1-RUNX1T1* or *B2M* transcript levels was 25 µl based on the following protocol: 2,5 µl cDNA, 12,5 µl TaqMan® Universal PCR Master Mix (2x), 3 pmol/µl of forward and reverse primers, as well as 1 pmol/µl of FAM/TAMRA labeled *RUNX1-RUNX1T1* or 2 pmol/µl of *B2M* probe, respectively. PCR conditions were: 50°C for 2 minutes and 95°C for 10 minutes (denaturation), followed by 50 cycles at 95°C for 15 seconds (annealing) and 60°C for 60 seconds (extension).

RT-qPCR analyses for *RUNX1-RUNX1T1* and *B2M* were performed in triplicates and included patient samples, negative template controls (NTC) and serial plasmid dilutions ( $10^2$ - $10^6$ ) for the respective genes. For sensitivity calculation, RNA of Kasumi-1 cell line (*RUNX1-RUNX1T1*-positive) and a patient sample were serially diluted in HL-60 cells (*RUNX1-RUNX1T1*-negative). In general, negativity of NTCs, correlation coefficient of the standard curve  $\geq 0.990$ , PCR efficiency of  $\geq 85\%$  and *B2M*  $\geq 50,000$  copy numbers were set as compulsory standards for each run. *RUNX1-RUNX1T1* transcript levels were reported as normalized values of *RUNX1-RUNX1T1* per  $10^6$  transcripts of the housekeeping gene *B2M* [*RUNX1-RUNX1T1* transcript levels/*B2M* transcript levels  $\times 10^6$ ]. As previously published by our group, the following equation was applied for calculation of *RUNX1-RUNX1T1* and *B2M* transcript levels:  $10^{(C_t - Y)/S}$  [C = average cycle threshold ( $C_t$ ) value from triplicates; Y = Y-intercept; S = slope of the standard curve].<sup>1</sup> RT-qPCR negativity was defined as  $C_t > Y$ -intercept. The maximum sensitivity of our assay was  $10^{-6}$ . All procedures are accredited under the DIN EN ISO/IEC 17025:2005 and DIN EN ISO 15189:2014 of the Deutsche Akkreditierungsstelle GmbH.

### **Statistical Analyses**

The definition of CR, relapse, event-free survival (EFS), relapse-free survival (RFS), and overall survival (OS) were based on recommended criteria.<sup>2</sup> The cumulative incidence of relapse (CIR) was calculated according to Gray.<sup>3</sup> Survival times were calculated from the date the MRD sample was obtained. The median follow-up for survival was calculated according to the method of Korn.<sup>4</sup> Logistic and Cox proportional hazards models were used to identify

prognostic variables for CR, OS, and CIR.<sup>5,6</sup> For *RUNX1-RUNX1T1* transcript levels, a  $\log_{10}$  transformation of the data was performed (hazard ratio [HR] for 10-fold higher value). In addition,  $\log_{10}$  transformation necessitated substitution of 0 by the first *RUNX1-RUNX1T1* transcript level defined as negative, 0.33. Additional covariables in multivariable analysis were age, BM blast counts, lactate dehydrogenase (LDH) serum levels, white blood cell counts (WBC) as continuous variable, and *KIT* mutation status as dichotomous variable. Determining cut-off values of prognostic factors in survival data with competing risks was done based on maximally selected log-rank statistics.<sup>7</sup> Comparisons of the distribution of *RUNX1-RUNX1T1* transcript levels according to qualitative group variables were performed using the Mann-Whitney U test. Correlations between continuous variables were calculated using the Spearman rank test. Survival distributions were calculated using the Kaplan-Meier method, and differences between two groups were analyzed using the two-sided log-rank test. Cumulative incidence functions were compared using Gray's test. An effect was considered significant if  $P < 5\%$ . All statistical analyses were performed with the statistical software environment R version 3.2.1, using the R packages rms version 4.1-1, survival version 2.41-3, cmprsk version 2.2-7, and IBM SPSS Statistics 25.

## References

1. Corbacioglu A, Scholl C, Schlenk RF, et al. Prognostic impact of minimal residual disease in CBFβ-MYH11-positive acute myeloid leukemia. *J Clin Oncol*. 2010;28(23):3724-3729.
2. Döhner H, Estey EH, Amadori S, et al. Diagnosis and management of acute myeloid leukemia in adults: recommendations from an international expert panel, on behalf of the European LeukemiaNet. *Blood*. 2010;115(3):453-474.
3. Gray R. A class of  $K$ -sample tests for comparing the cumulative incidence of a competing risk. *Ann Stat*. 1988;16(3):1141-1154.
4. Korn EL. Censoring distributions as a measure of follow-up in survival analysis. *Stat Med*. 1986;5(3):255-260.
5. Therneau TM, Grambsch PM. *Modeling Survival Data: Extending the Cox Model*, Springer (New York); 2000.
6. Cox DR. Regression models and life-tables. *J R Stat Soc B*. 1972;34(2):187-220.
7. Woo SY, Kim S, Kim J. Determining cutoff values of prognostic factors in survival data with competing risks. *CompStat*. 2016;31(1): 369–386.

**Supplemental Table T1.** Distribution of BM and PB samples during therapy and follow-up.

**Number of samples:**

| <b>Time point</b>             | <b>BM samples, n</b>   | <b>PB samples, n</b>   |
|-------------------------------|------------------------|------------------------|
| <b>Diagnosis</b>              | <b>145</b>             | <b>135</b>             |
| <b>Cycle 1</b>                | <b>111</b>             | <b>91</b>              |
| <b>Cycle 2</b>                | <b>110<sup>§</sup></b> | <b>101<sup>#</sup></b> |
| <b>Cycle 3</b>                | <b>105</b>             | <b>87</b>              |
| <b>Cycle 4</b>                | <b>99</b>              | <b>95</b>              |
| <b>Cycle 5</b>                | <b>73</b>              | <b>62</b>              |
| <b>Cycle 6</b>                | <b>8</b>               | <b>7</b>               |
| <b>End of treatment (EOT)</b> | <b>99</b>              | <b>86</b>              |
| <b>3 months (after EOT)</b>   | <b>78</b>              | <b>72</b>              |
| <b>6 months (after EOT)</b>   | <b>61</b>              | <b>53</b>              |
| <b>9 months (after EOT)</b>   | <b>47</b>              | <b>44</b>              |
| <b>12 months (after EOT)</b>  | <b>46</b>              | <b>46</b>              |
| <b>15 months (after EOT)</b>  | <b>36</b>              | <b>39</b>              |
| <b>18 months (after EOT)</b>  | <b>41</b>              | <b>46</b>              |
| <b>21 months (after EOT)</b>  | <b>31</b>              | <b>33</b>              |
| <b>24 months (after EOT)</b>  | <b>23</b>              | <b>26</b>              |
| <b>27 months (after EOT)</b>  | <b>14</b>              | <b>17</b>              |
| <b>30 months (after EOT)</b>  | <b>18</b>              | <b>19</b>              |
| <b>33 months (after EOT)</b>  | <b>7</b>               | <b>9</b>               |
| <b>36 months (after EOT)</b>  | <b>11</b>              | <b>18</b>              |
| <b>39 months (after EOT)</b>  | <b>5</b>               | <b>5</b>               |
| <b>42 months (after EOT)</b>  | <b>6</b>               | <b>9</b>               |
| <b>45 months (after EOT)</b>  | <b>4</b>               | <b>6</b>               |
| <b>48 months (after EOT)</b>  | <b>4</b>               | <b>9</b>               |

Abbreviations: EOT, end of treatment; BM, bone marrow; PB, peripheral blood. <sup>§</sup>60 patients received induction II, 50 patients received consolidation I; <sup>#</sup>58 patients received induction II, 43 patients received consolidation I.

**Supplemental Table T2: Baseline characteristics and outcome according to trial cohorts.**

| Study                                               | HD98A <sup>#</sup><br>(n=14) | AMLSG 07-04 <sup>#</sup><br>(n=43) | AMLSG 11-08 <sup>§</sup><br>(n=32) | AMLSG 21-13 <sup>§</sup><br>(n=45) | Other<br>(n=21)      | P value |
|-----------------------------------------------------|------------------------------|------------------------------------|------------------------------------|------------------------------------|----------------------|---------|
| Median age, years (range)                           | 42 (19 – 59)                 | 38 (18 – 57)                       | 52 (27 – 73)                       | 50 (21 – 76)                       | 56 (19 – 72)         | 0.0002  |
| Male sex, n (%)                                     | 9 (64)                       | 23 (53)                            | 18 (56)                            | 26 (58)                            | 10 (48)              | 0.8882  |
| <b>AML history, n (%)</b>                           |                              |                                    |                                    |                                    |                      |         |
| <i>De novo</i>                                      | 14 (100)                     | 41 (95)                            | 27 (84)                            | 33 (89)                            | 17 (85)              | 0.5118  |
| Secondary                                           | 0 (0)                        | 0 (0)                              | 1 (3)                              | 1 (3)                              | 0 (0)                |         |
| Therapy-related                                     | 0 (0)                        | 2 (5)                              | 4 (13)                             | 3 (8)                              | 3 (15)               |         |
| Missing data, n                                     | 0                            | 0                                  | 0                                  | 8                                  | 1                    |         |
| Median WBC, x 10 <sup>9</sup> /l (range)            | 9.3 (1.0 – 60.5)             | 10.0 (1.2 – 48.2)                  | 9.0 (1.4 – 45.7)                   | 7.8 (1.6 – 118)                    | 7.7 (1.9 – 45)       | 0.8269  |
| Missing data, n                                     | 0                            | 1                                  | 0                                  | 7                                  | 1                    |         |
| Median platelet count, x 10 <sup>9</sup> /l (range) | 37<br>(16 – 226)             | 23<br>(5 – 303)                    | 32<br>(8 – 279)                    | 34<br>(5 – 246)                    | 32<br>(3 – 119)      | 0.7152  |
| Missing data, n                                     | 0                            | 1                                  | 0                                  | 7                                  | 1                    |         |
| Median hemoglobin, g/dl (range)                     | 8.7 (4.2 – 14.8)             | 8.8 (4.6 – 15.1)                   | 9.2 (5.2 – 13.2)                   | 8.9 (3.8 – 12.5)                   | 9.0 (4.8 – 11.2)     | 0.2194  |
| Missing data, n                                     | 0                            | 1                                  | 0                                  | 7                                  | 1                    |         |
| Median peripheral blood blasts, % (range)           | 52<br>(16 – 90)              | 47<br>(4 – 99)                     | 35<br>(0 – 85)                     | 39<br>(0 – 82)                     | 40<br>(0 – 79)       | 0.3820  |
| Missing data, n                                     | 1                            | 4                                  | 1                                  | 11                                 | 1                    |         |
| Median bone marrow blasts, % (range)                | 45<br>(6 – 85)               | 65<br>(20 – 100)                   | 60<br>(13 – 95)                    | 50<br>(15 – 100)                   | 58<br>(17 – 91)      | 0.2412  |
| Missing data, n                                     | 3                            | 0                                  | 1                                  | 8                                  | 2                    |         |
| Median LDH, U/l (range)                             | 530<br>(213 – 1,662)         | 476<br>(138 – 3,550)               | 484<br>(226 – 1,968)               | 428<br>(5 – 1,910)                 | 417<br>(205 – 4,420) | 0.6610  |
| Missing data, n                                     | 9                            | 1                                  | 0                                  | 7                                  | 0                    |         |
| <i>KIT</i> mutation, n (%)                          | 4 (29)                       | 17 (41)                            | 6 (19)                             | 7 (21)                             | 5 (28)               | 0.2204  |
| Missing data, n                                     | 0                            | 2                                  | 1                                  | 11                                 | 3                    |         |
| <i>FLT3</i> -ITD/TKD mutation, n (%)                | 1 (7)                        | 3 (8)                              | 3 (9)                              | 4 (9)                              | 3 (14)               | 0.9348  |
| Missing data, n                                     | 0                            | 4                                  | 0                                  | 0                                  | 0                    |         |
| <i>NRAS</i> mutation, n (%)                         | 2 (14)                       | 8 (20)                             | 6 (19)                             | 6 (17)                             | 2 (11)               | 0.9435  |
| Missing data, n                                     | 0                            | 2                                  | 0                                  | 10                                 | 3                    |         |
| <i>ASXL2</i> mutation, n (%)                        | 6 (46)                       | 7 (17)                             | 2 (7)                              | 0 (0)                              | 3 (23)               | 0.0240  |
| Missing data, n                                     | 1                            | 1                                  | 3                                  | 45                                 | 8                    |         |
| <b>Response</b>                                     |                              |                                    |                                    |                                    |                      |         |
| CR after cycle I                                    | 9 (64)                       | 35 (81)                            | 26 (81)                            | 35 (78)                            | 14 (67)              | 0.5046  |
| RD after cycle I                                    | 1 (7)                        | 2 (5)                              | 0 (0)                              | 0 (0)                              | 0 (0)                |         |
| PR after cycle I                                    | 4 (29)                       | 6 (14)                             | 6 (19)                             | 10 (22)                            | 7 (33)               |         |

|                                 |          |          |          |         |          |        |
|---------------------------------|----------|----------|----------|---------|----------|--------|
| <b>CR after cycle II</b>        | 14 (100) | 43 (100) | 32 (100) | 42 (98) | 21 (100) | 0.9544 |
| <b>RD after cycle II</b>        | 0 (0)    | 0 (0)    | 0 (0)    | 1 (2)   | 0 (0)    |        |
| <b>Outcome</b>                  |          |          |          |         |          |        |
| <b>OS</b>                       |          |          |          |         |          | 0.2992 |
| <b>Median, years</b>            | 4.95     | NR       | NR       | NR      | NR       |        |
| <b>3-year survival rate (%)</b> | 57       | 84       | 71       | 78      | 77       |        |
| <b>4-year survival rate (%)</b> | 57       | 80       | 71       | NR      | 77       |        |
| <b>EFS</b>                      |          |          |          |         |          | 0.6568 |
| <b>Median, years</b>            | 1.52     | 7.95     | NR       | NR      | NR       |        |
| <b>3-year survival rate (%)</b> | 50       | 67       | 68       | 70      | 58       |        |
| <b>4-year survival rate (%)</b> | 43       | 67       | 68       | NR      | 58       |        |
| <b>RFS</b>                      |          |          |          |         |          | 0.5165 |
| <b>Median, years</b>            | 1.27     | 7.87     | NR       | NR      | NR       |        |
| <b>3-year survival rate (%)</b> | 50       | 70       | 68       | 69      | 54       |        |
| <b>4-year survival rate (%)</b> | 43       | 70       | 68       | NR      | 54       |        |

# included patients 18 to 60 years; § included patients ≥18 years (no age limit)  
NR, not reached

**Supplemental Table T3:** Multivariable analysis for response to induction I.

|                                        | <b>CR after cycle 1</b> |          |
|----------------------------------------|-------------------------|----------|
|                                        | <b>OR (95% CI)</b>      | <b>P</b> |
|                                        | <b>n=120</b>            |          |
| <b>Log<sub>10</sub>TL diagnosis BM</b> | 0.93 (0.32-2.72)        | 0.895    |
| <b><i>KIT</i><sup>mut</sup></b>        | 0.28 (0.11-0.76)        | 0.012    |
| <b>Age</b>                             | 1.00 (0.97-1.04)        | 0.936    |
| <b>BM blasts</b>                       | 1.01 (0.99-1.03)        | 0.258    |
| <b>LDH</b>                             | 1.00 (1.00-1.00)        | 0.055    |
| <b>WBC</b>                             | 0.98 (0.95-1.02)        | 0.984    |

**Supplemental Table T4:** Multivariable analysis determining the prognostic significance of MR<sup>3.0</sup> after cycle 2 in BM and PB.

|                                                 | <b>Relapse</b>     |          |
|-------------------------------------------------|--------------------|----------|
|                                                 | <b>HR (95% CI)</b> | <b>P</b> |
|                                                 | <b>n=92</b>        |          |
| <b>Transcript level reduction after cycle 2</b> |                    |          |
| <b>BM</b>                                       |                    |          |
| <b>MR<sup>3.0</sup></b>                         | 0.48 (0.24-0.98)   | 0.043    |
| <b><i>KIT</i><sup>mut</sup></b>                 | 2.03 (0.97-4.22)   | 0.059    |
| <b>Age</b>                                      | 1.00 (0.97-1.03)   | 0.959    |
| <b>BM blasts</b>                                | 1.00 (0.98-1.01)   | 0.773    |
| <b>LDH</b>                                      | 1.00 (1.00-1.00)   | 0.983    |
| <b>WBC</b>                                      | 1.00 (0.98-1.03)   | 0.971    |
|                                                 | <b>n=81</b>        |          |
| <b>PB</b>                                       |                    |          |
| <b>MR<sup>3.0</sup></b>                         | 0.35 (0.14-0.85)   | 0.021    |
| <b><i>KIT</i><sup>mut</sup></b>                 | 1.72 (0.77-3.83)   | 0.184    |
| <b>Age</b>                                      | 1.00 (0.97-1.03)   | 0.875    |
| <b>BM blasts</b>                                | 1.01 (0.99-1.02)   | 0.626    |
| <b>LDH</b>                                      | 1.00 (1.00-1.00)   | 0.525    |
| <b>WBC</b>                                      | 1.01 (0.99-1.03)   | 0.262    |



**Supplemental Table T5:** Multivariable analyses stratified according to dasatinib treatment determining the prognostic significance of *RUNX1-RUNX1T1* transcript levels, MRD cut-off values, and MRD<sup>neg</sup> at EOT in BM and PB.

| Transcript Level               | Death             |       | Relapse           |        |
|--------------------------------|-------------------|-------|-------------------|--------|
|                                | HR (95% CI)       | P     | HR (95% CI)       | P      |
|                                | <b>n=81</b>       |       | <b>n=82</b>       |        |
| <b>BM</b>                      |                   |       |                   |        |
| Log <sub>10</sub> TL           | 1.71 (1.12-2.62)  | 0.013 | 1.76 (1.21-2.54)  | 0.003  |
| <i>KIT</i> <sup>mut</sup>      | 2.87 (0.97-8.48)  | 0.056 | 2.08 (0.84-5.13)  | 0.114  |
| Age                            | 1.02 (0.98-1.07)  | 0.362 | 1.00 (0.97-1.04)  | 0.909  |
| BM blasts                      | 0.99 (0.97-1.01)  | 0.368 | 1.00 (0.98-1.02)  | 0.977  |
| LDH                            | 1.00 (1.00-1.00)  | 0.938 | 1.00 (1.00-1.00)  | 0.769  |
| WBC                            | 1.03 (1.00-1.05)  | 0.064 | 1.01 (0.97-1.04)  | 0.754  |
| <b>PB</b>                      | <b>n=71</b>       |       | <b>n=72</b>       |        |
| Log <sub>10</sub> TL           | 1.61 (1.06-2.43)  | 0.025 | 2.91 (1.79-4.74)  | <0.001 |
| <i>KIT</i> <sup>mut</sup>      | 4.33 (1.41-13.31) | 0.011 | 3.07 (1.24-7.60)  | 0.015  |
| Age                            | 1.01 (0.97-1.06)  | 0.595 | 1.00 (0.97-1.04)  | 0.811  |
| BM blasts                      | 0.99 (0.97-1.02)  | 0.564 | 1.01 (0.99-1.03)  | 0.522  |
| LDH                            | 1.00 (1.00-1.00)  | 0.898 | 1.00 (1.00-1.00)  | 0.570  |
| WBC                            | 1.02 (0.99-1.05)  | 0.220 | 1.00 (0.97-1.04)  | 0.813  |
| <b>Specific cut-off values</b> | <b>n=81</b>       |       | <b>n=82</b>       |        |
| <b>BM</b>                      |                   |       |                   |        |
| Absolute TL >83                | 4.88 (1.47-16.26) | 0.010 | 3.98 (1.60-9.89)  | 0.003  |
| <i>KIT</i> <sup>mut</sup>      | 2.62 (0.86-8.02)  | 0.091 | 2.07 (0.84-5.09)  | 0.112  |
| Age                            | 1.03 (0.98-1.08)  | 0.207 | 1.01 (0.98-1.05)  | 0.506  |
| BM blasts                      | 0.99 (0.97-1.01)  | 0.382 | 1.00 (0.98-1.02)  | 0.991  |
| LDH                            | 1.00 (1.00-1.00)  | 0.828 | 1.00 (1.00-1.00)  | 0.747  |
| WBC                            | 1.02 (1.00-1.05)  | 0.076 | 1.01 (0.98-1.04)  | 0.754  |
| <b>PB</b>                      | <b>n=71</b>       |       | <b>n=72</b>       |        |
| Absolute TL >5                 | 3.36 (1.06-10.66) | 0.040 | 5.40 (2.01-14.51) | 0.001  |
| <i>KIT</i> <sup>mut</sup>      | 3.92 (1.29-11.88) | 0.016 | 3.12 (1.27-7.66)  | 0.013  |
| Age                            | 1.01 (0.97-1.05)  | 0.750 | 1.00 (0.97-1.03)  | 0.961  |
| BM blasts                      | 1.00 (0.97-1.02)  | 0.756 | 1.00 (0.98-1.02)  | 0.682  |
| LDH                            | 1.00 (1.00-1.00)  | 0.701 | 1.00 (1.00-1.00)  | 0.473  |
| WBC                            | 1.02 (0.99-1.05)  | 0.181 | 1.01 (0.98-1.04)  | 0.679  |
| <b>MRD<sup>neg</sup></b>       | <b>n=81</b>       |       | <b>n=82</b>       |        |
| <b>BM</b>                      |                   |       |                   |        |
| MRD <sup>neg</sup>             | 0.22 (0.05-0.88)  | 0.033 | 0.39 (0.15-0.97)  | 0.042  |
| <i>KIT</i> <sup>mut</sup>      | 2.48 (0.84-7.34)  | 0.100 | 2.13 (0.88-5.15)  | 0.094  |
| Age                            | 1.01 (0.97-1.06)  | 0.565 | 1.00 (0.97-1.04)  | 0.924  |
| BM blasts                      | 0.99 (0.97-1.02)  | 0.503 | 1.00 (0.98-1.02)  | 0.836  |
| LDH                            | 1.00 (1.00-1.00)  | 0.986 | 1.00 (1.00-1.00)  | 0.782  |
| WBC                            | 1.03 (1.00-1.05)  | 0.076 | 1.00 (0.97-1.04)  | 0.864  |
| <b>PB</b>                      | <b>n=71</b>       |       | <b>n=72</b>       |        |
| MRD <sup>neg</sup>             | 0.28 (0.09-0.81)  | 0.019 | 0.37 (0.16-0.87)  | 0.022  |
| <i>KIT</i> <sup>mut</sup>      | 3.44 (1.12-10.54) | 0.031 | 2.24 (0.95-5.30)  | 0.067  |
| Age                            | 1.01 (0.97-1.05)  | 0.628 | 1.01 (0.98-1.04)  | 0.576  |
| BM blasts                      | 0.99 (0.97-1.02)  | 0.596 | 1.00 (0.98-1.02)  | 0.999  |
| LDH                            | 1.00 (1.00-1.00)  | 0.813 | 1.00 (1.00-1.00)  | 0.789  |
| WBC                            | 1.02 (0.99-1.05)  | 0.189 | 1.00 (0.97-1.03)  | 0.848  |

Abbreviations: MRD<sup>neg</sup>, MRD negativity; EOT, end of treatment; BM, bone marrow; PB, peripheral blood; HR, hazard ratio; CI, confidence interval; P, p-value; n, number of patients included in the analysis; TL, transcript levels; *KIT*<sup>mut</sup>, mutated *KIT* gene; LDH, lactate dehydrogenase; WBC, white blood cell count

**Supplemental Table T6:** Impact of additional dasatinib treatment on MRD<sup>neg</sup> at EOT.

|                                 | Dasatinib (pt no) | No Dasatinib (pt no) | P value |
|---------------------------------|-------------------|----------------------|---------|
| <b>EOT BM (n=99)</b>            |                   |                      |         |
| <b>MRD<sup>neg</sup> EOT BM</b> | 24                | 27                   | 0.0608  |
| <b>MRD<sup>pos</sup> EOT BM</b> | 13                | 35                   |         |
|                                 |                   |                      |         |
| <b>EOT PB (n=86)</b>            |                   |                      |         |
| <b>MRD<sup>neg</sup> EOT PB</b> | 28                | 36                   | 0.0113  |
| <b>MRD<sup>pos</sup> EOT PB</b> | 3                 | 19                   |         |

**Supplemental Table T7:** Impact of additional dasatinib treatment on outcome.

| Dasatinib treatment | OS               |       | CIR              |       |
|---------------------|------------------|-------|------------------|-------|
|                     | HR (95% CI)      | P     | HR (95% CI)      | P     |
| <b>BM</b>           |                  |       |                  |       |
| After Cycle 1       | 0.95 (0.45-1.99) | 0.881 | 0.49 (0.20-1.08) | 0.077 |
| After Cycle 2       | 0.82 (0.36-1.89) | 0.644 | 0.54 (0.24-1.19) | 0.124 |
| At EOT              | 0.89 (0.33-2.40) | 0.814 | 0.75 (0.32-1.75) | 0.509 |
| <b>PB</b>           |                  |       |                  |       |
| After Cycle 1       | 1.19 (0.48-2.96) | 0.710 | 0.68 (0.30-1.57) | 0.369 |
| After Cycle 2       | 1.21 (0.48-3.02) | 0.691 | 0.87 (0.40-1.88) | 0.718 |
| At EOT              | 0.49 (0.16-1.51) | 0.216 | 0.67 (0.29-1.54) | 0.345 |

**Supplemental Figure F1**

Cumulative incidence of relapse (CIR) of the 155 *RUNX1-RUNX1T1*-positive AML patients.

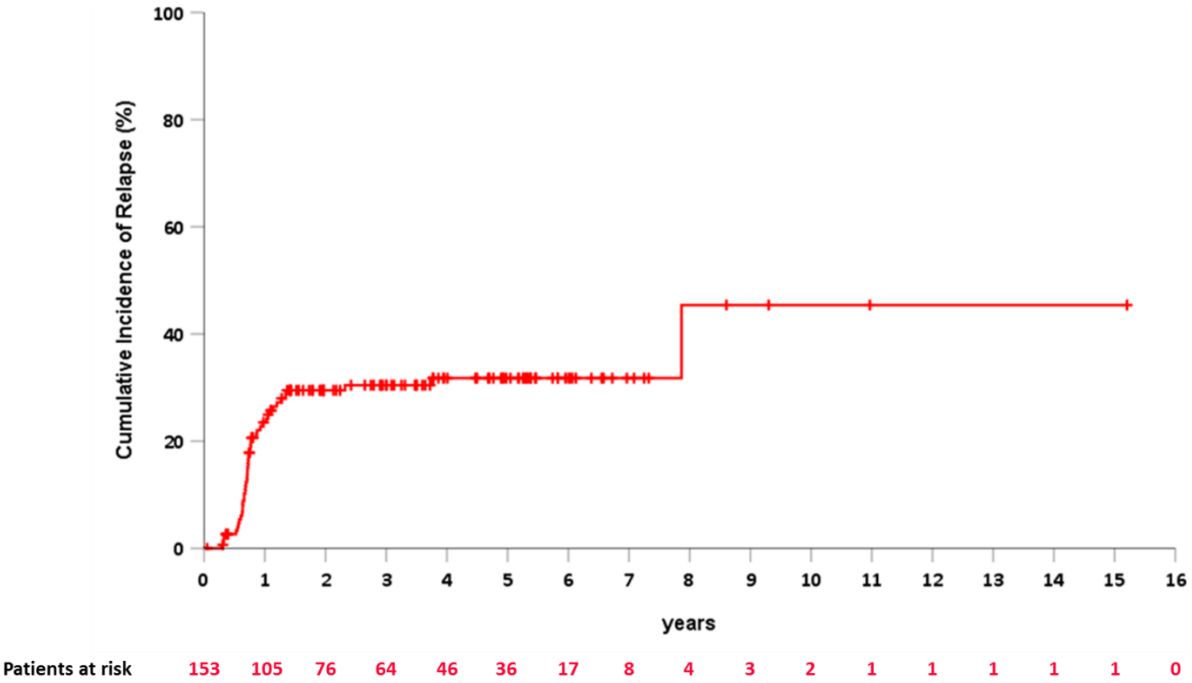

**Supplemental Figure F2:**

Maximally selected Gray's statistic for competing risks delineated cut-offs at EOT being associated with a low risk of relapse. For BM, MRD level below 83 *RUNX1-RUNX1T1* transcript level predicted for superior 4-year rates of CIR (18% vs 61%;  $P<0.0001$ ) (A and B). For PB, MRD level below 5 *RUNX1-RUNX1T1* transcript level predicted for superior 4-year rates of CIR (23% vs 65%;  $P<0.0001$ ) (C and D).

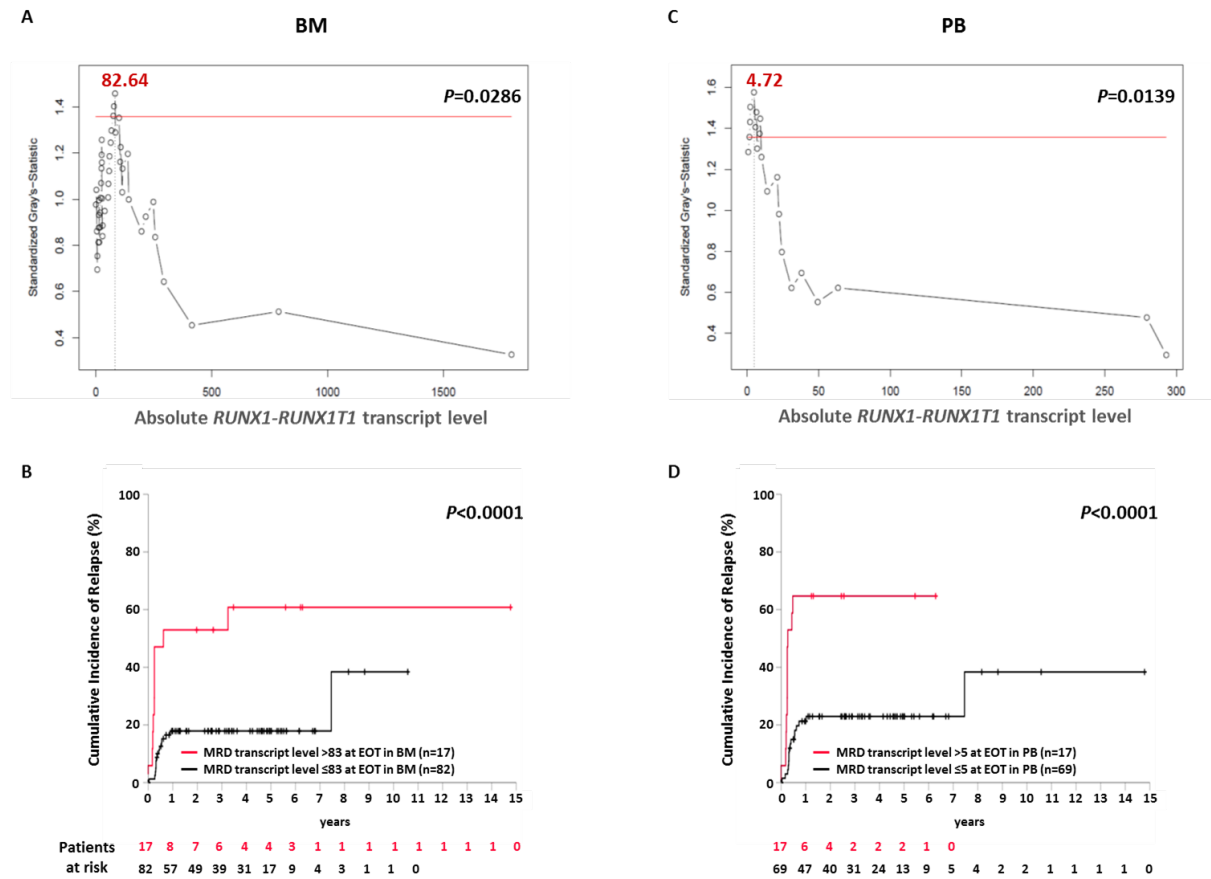

### Supplemental Figure F3:

Impact of additional dasatinib treatment on MRD kinetics.  $\text{Log}_{10}$  *RUNX1-RUNX1T1* transcript levels (upper panel) and the reduction of *RUNX1-RUNX1T1* transcript levels (lower panel) are shown for BM (left) and PB (right) during the course of treatment.

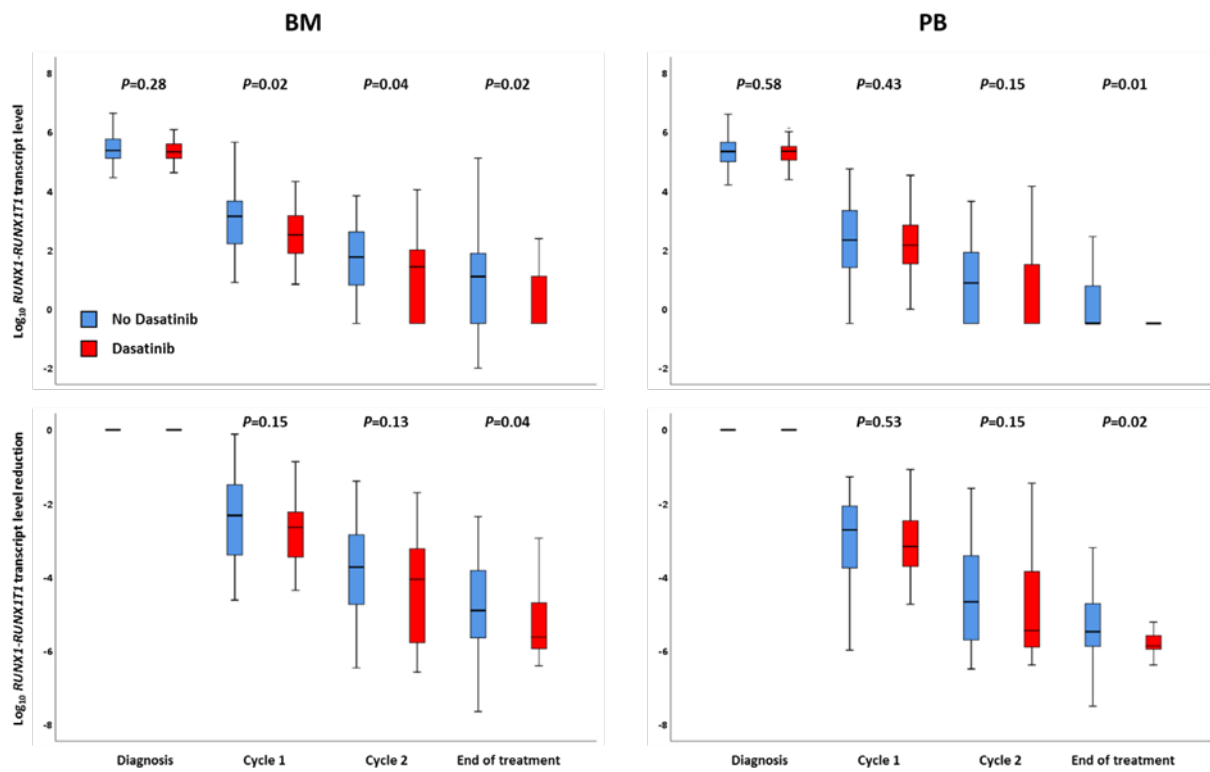

**Supplemental Figure F4:**

Cumulative incidence of relapse (CIR) during follow-up based on defined MRD cut-offs in BM and PB according to additional dasatinib treatment (B and D).

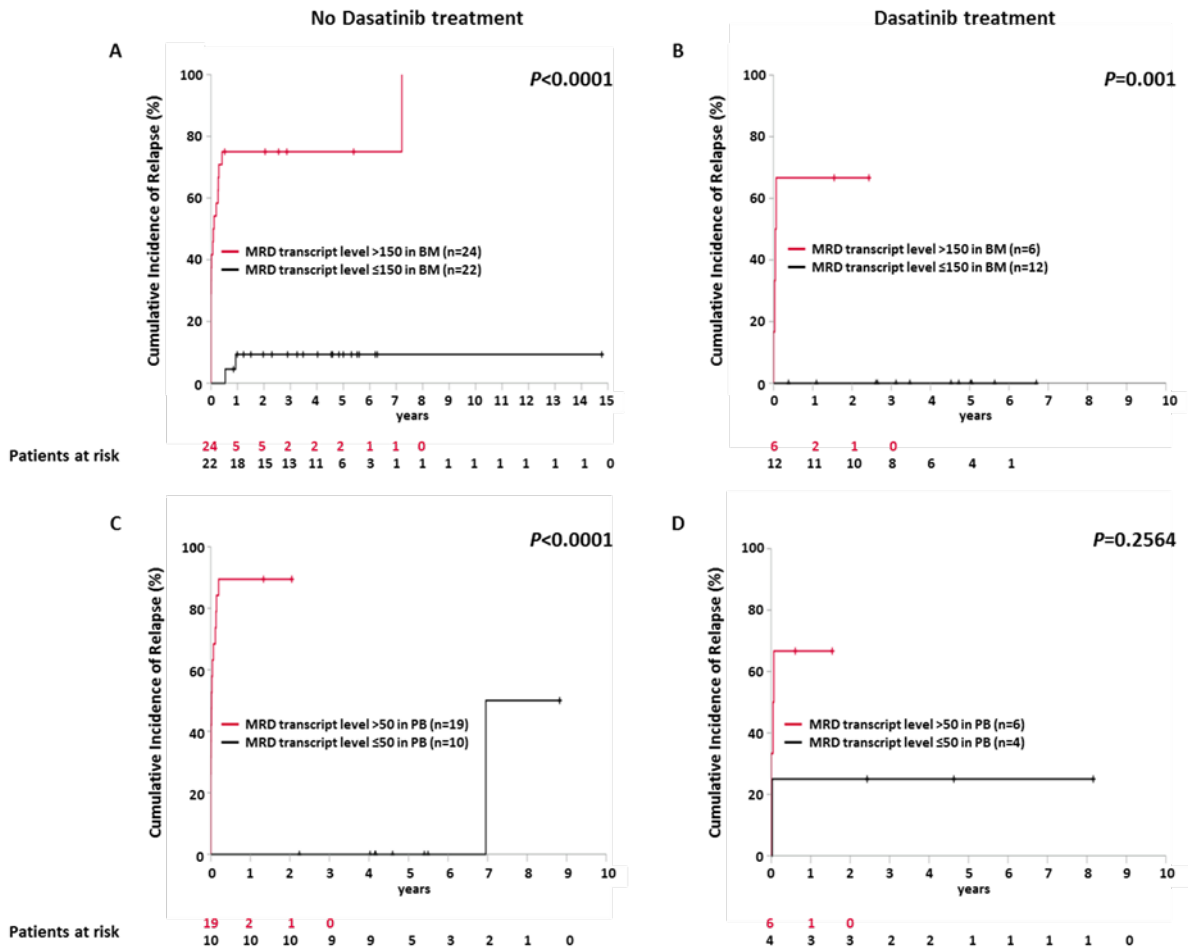

Supplement: bloodBLD2019001425-suppl1.pdf [file bloodBLD2019001425-suppl1.pdf]
